# Supplementary material for: Exercise reduces metabolic burden while altering the immune system in aged mice
Source: PubMed Central journal article supplement (PMC7834985; doi:10.18632/aging.202312), 2021-01-06
Supplement: aging-13-202312-s001.pdf [file aging-13-202312-s001.pdf]

## SUPPLEMENTARY FIGURES

A

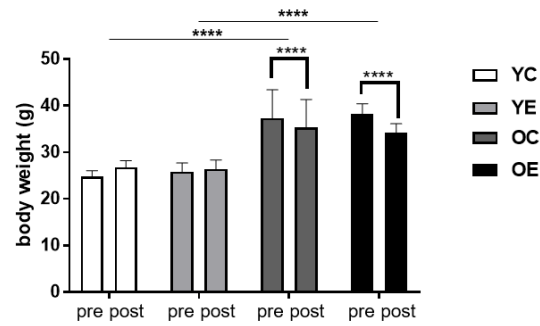

B

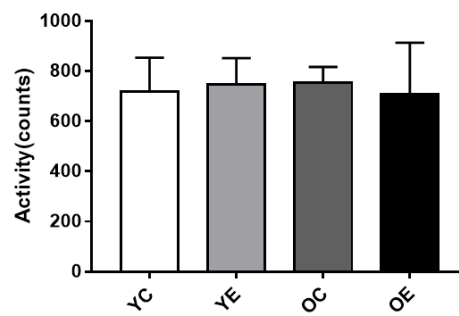

**Supplementary Figure 1.** (A) Body composition change with or without 4-week of treadmill training. (B) The average (mean  $\pm$  SD) x, y, and z activity. \*\*\*\* $p < 0.0001$ .

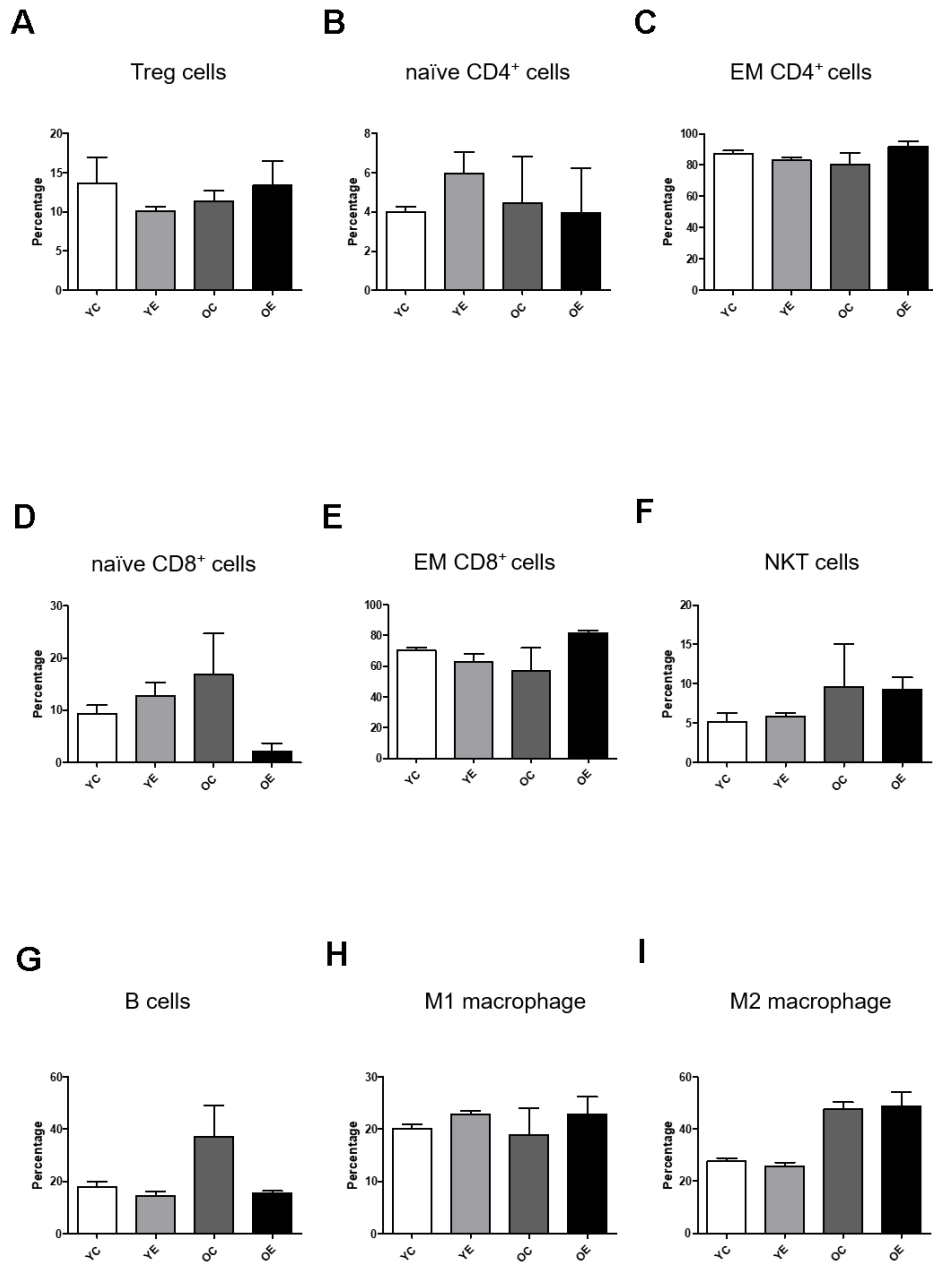

**Supplementary Figure 2. Effect of exercise on immune cell profiling in SVF of young and aged mice.** Bar graph depict the mean frequencies ( $\pm$  SEM) of (A) Treg, (B) naïve CD4<sup>+</sup> cells, (C) EM CD4<sup>+</sup> cells, (D) naïve CD8<sup>+</sup> cells, (E) EM CD8<sup>+</sup> cells, (F) NKT cells, (G) B cells, (H) M1 macrophage, (I) M2 macrophage in SVF.

A

OC vs YC

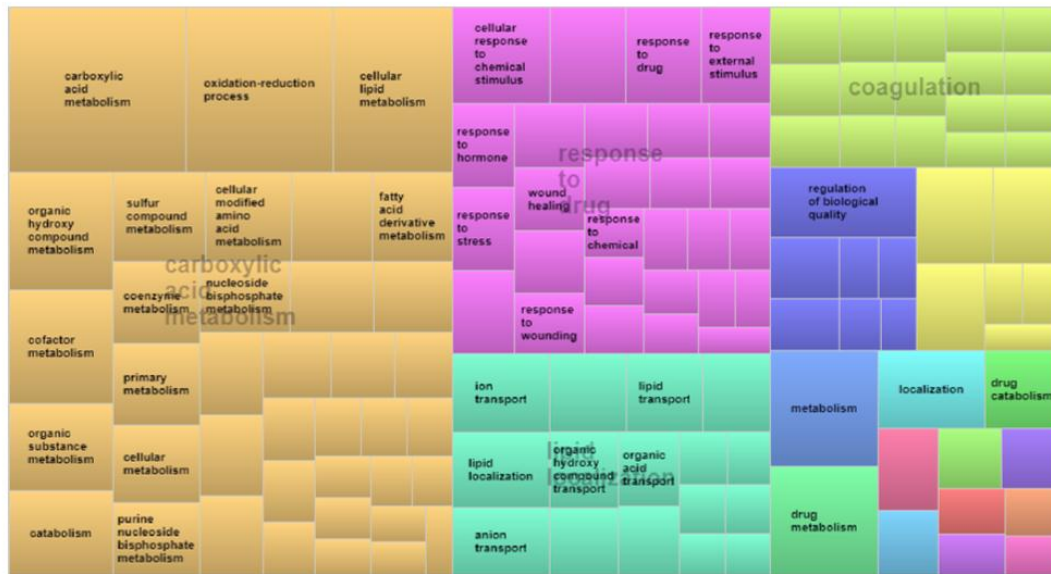

B

OE vs OC

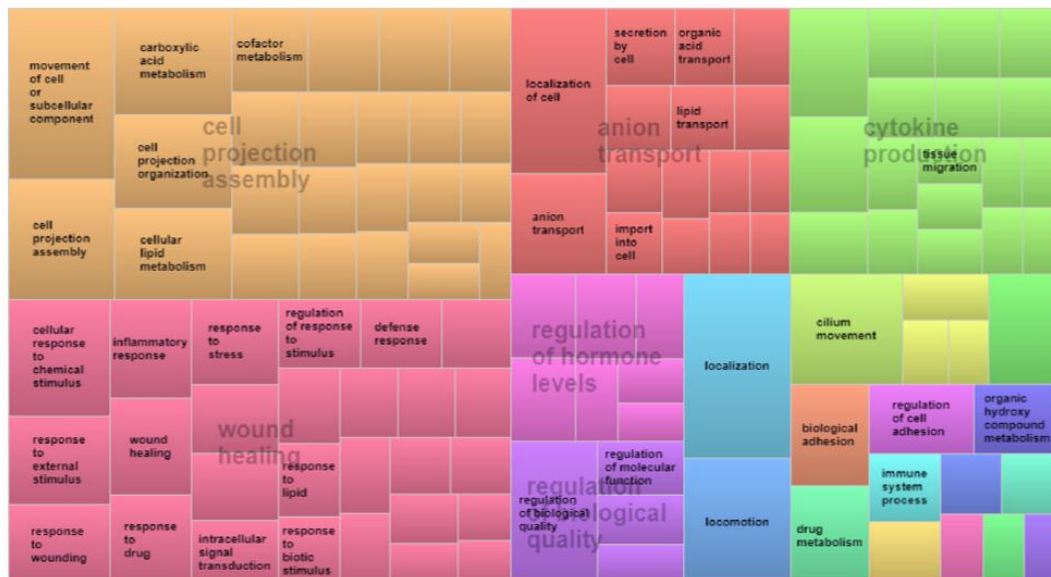

**Supplementary Figure 3. Gene ontology based- treeMap view of REVIGO.** Exercise-induced altered gene expression in adipose tissue of aged mice. (A) OC versus YC (B) OE versus OC. Size of the rectangles may be adjusted to reflect the frequency of the gene ontology term in the underlying Gene Ontology Annotation Database.
